# Supplementary material
Source: ML conference proceedings conference paper supplement (https://openreview.net/forum?id=cjH0Qsgd0D)

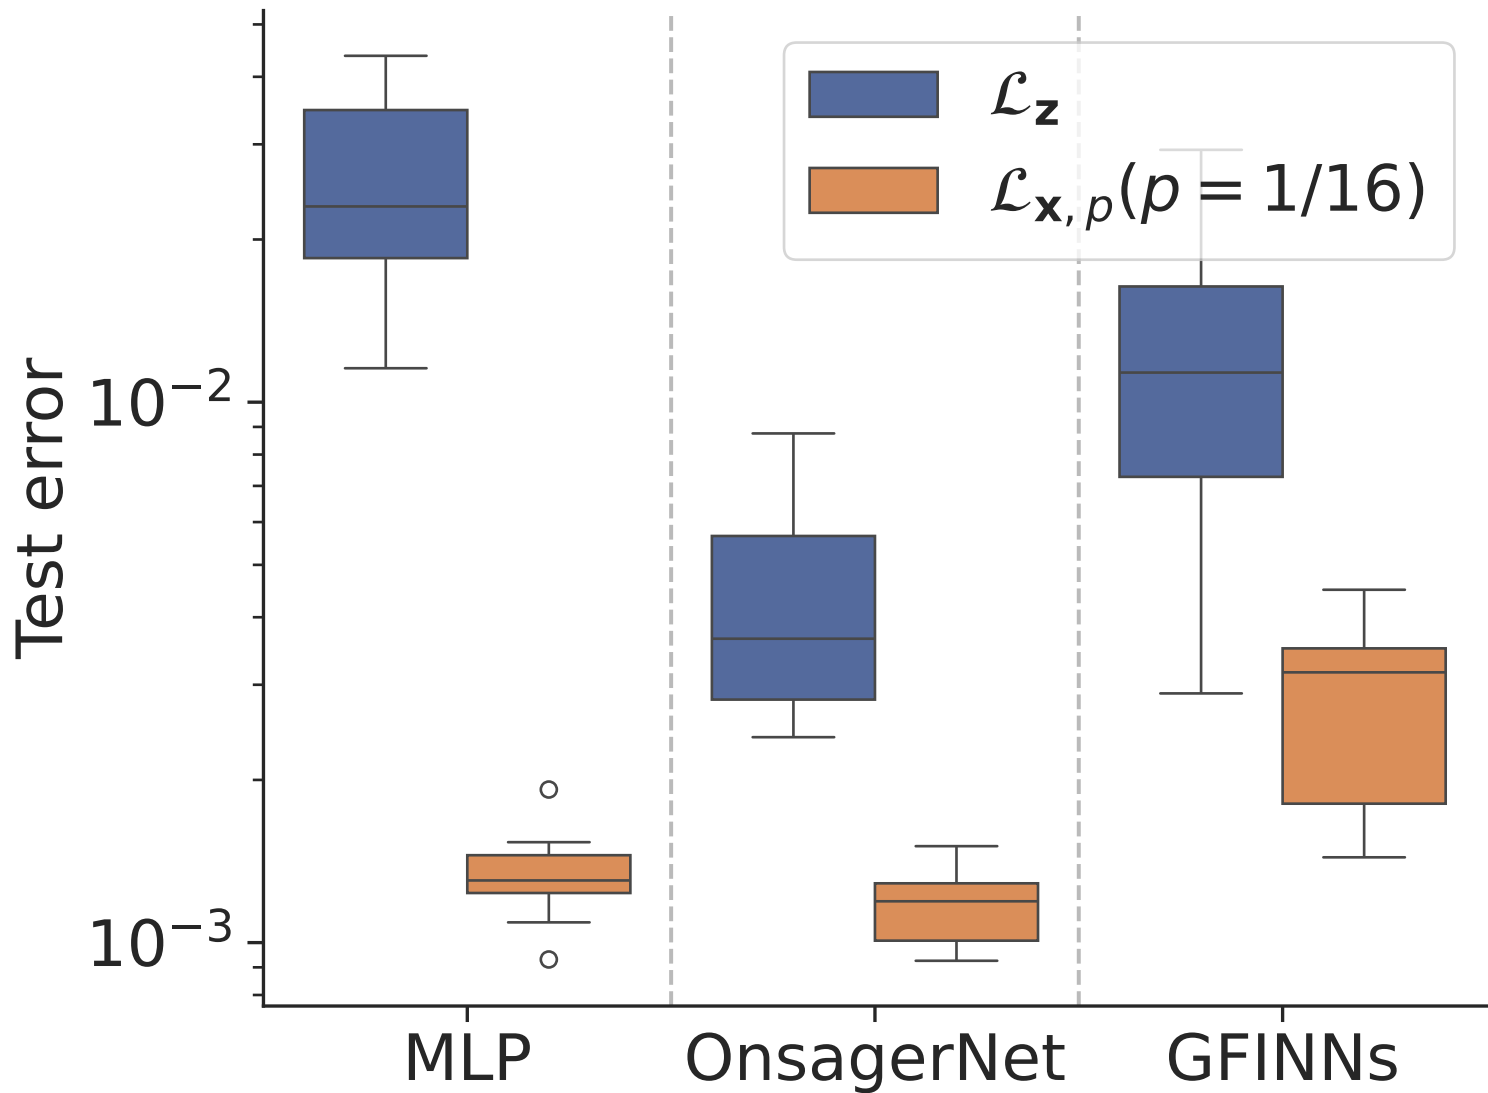

Supplement: supplementary_material [file attachment]

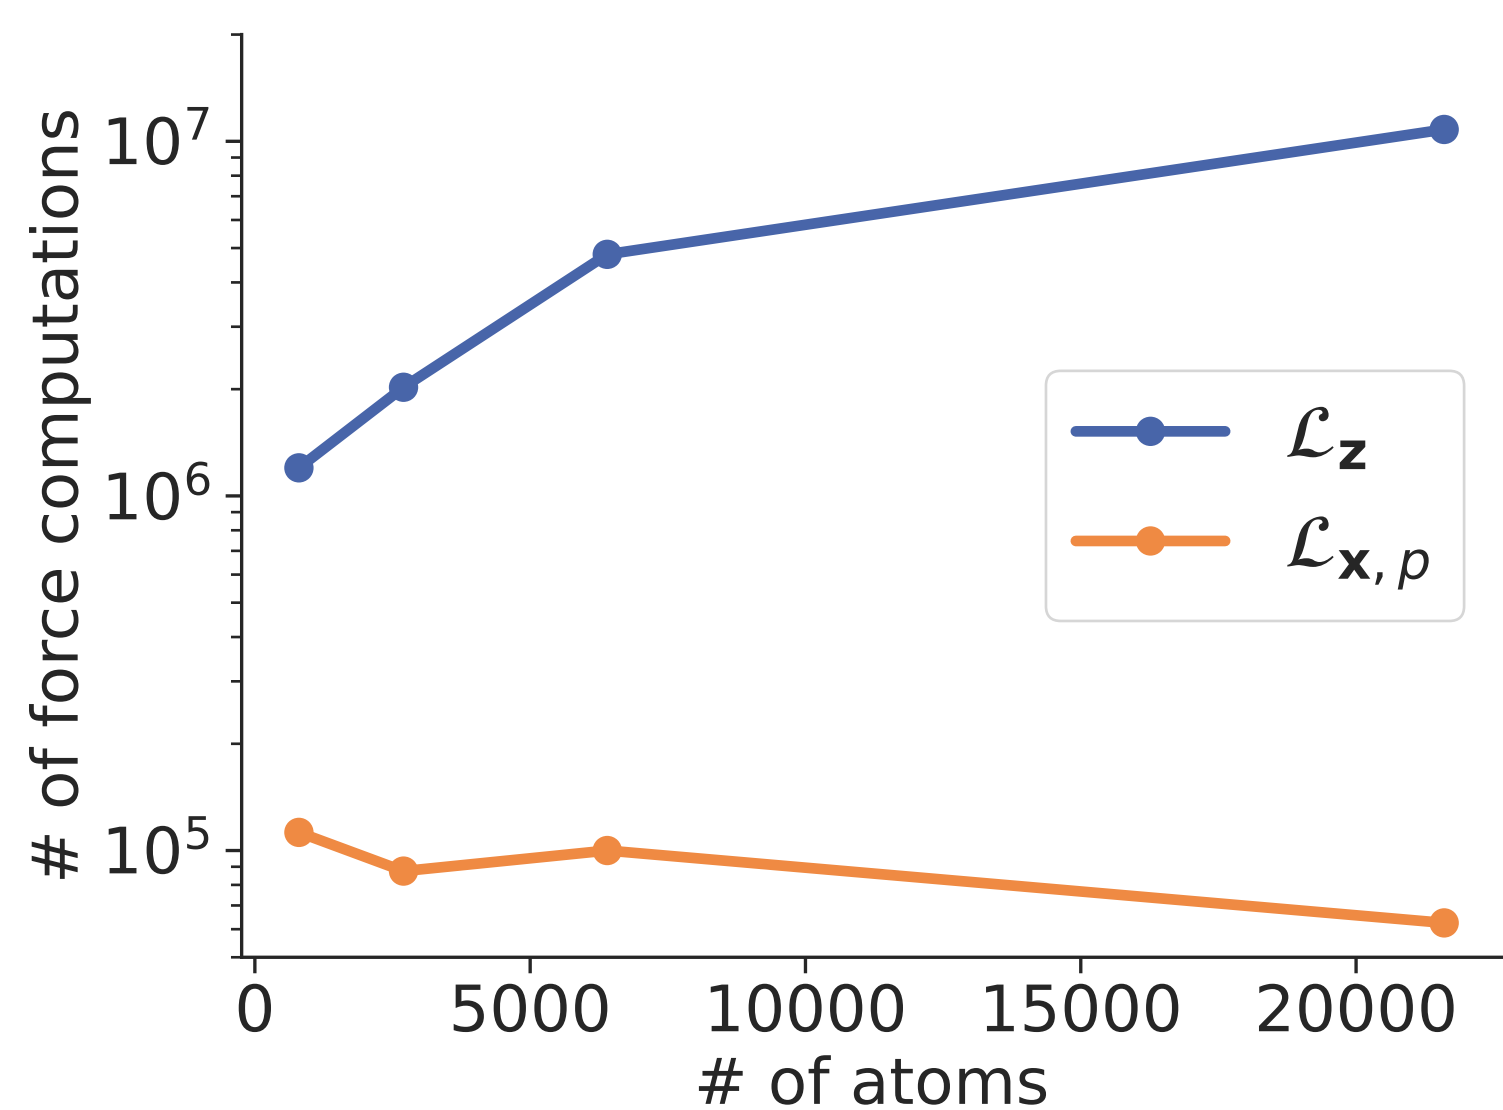

Supplement: supplementary_material [file attachment]

Free energy

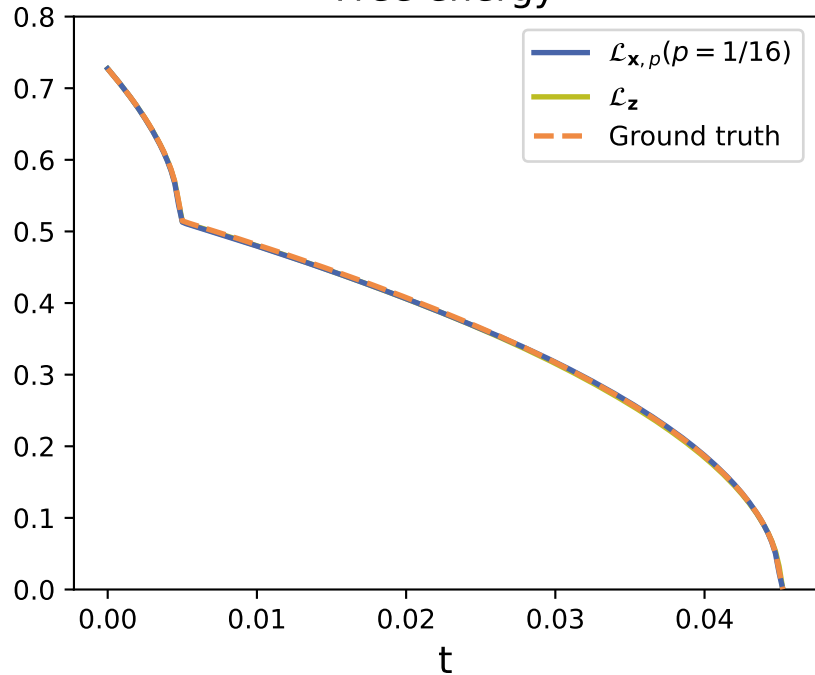

Error

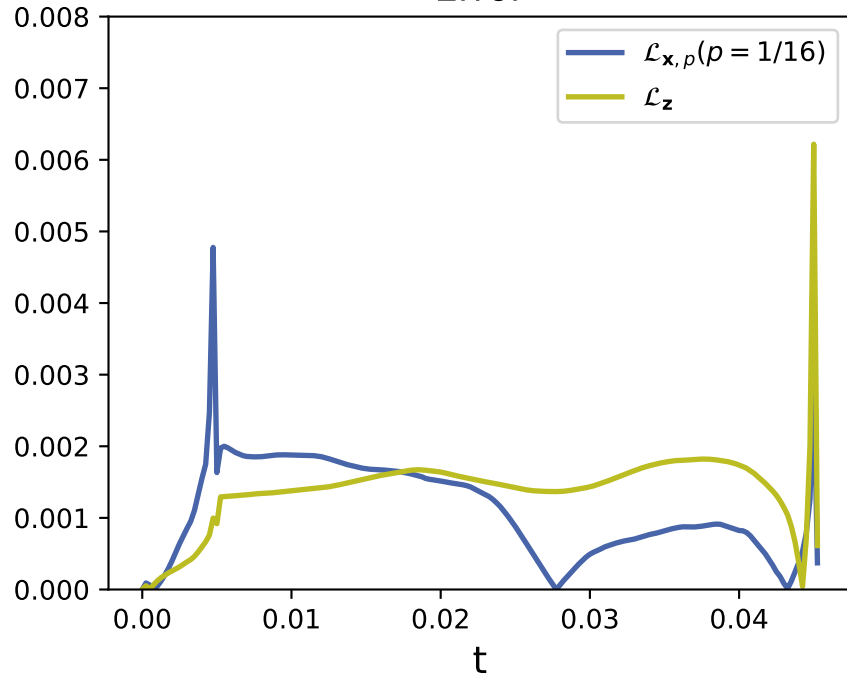

Supplement: supplementary_material [file attachment]

Free energy

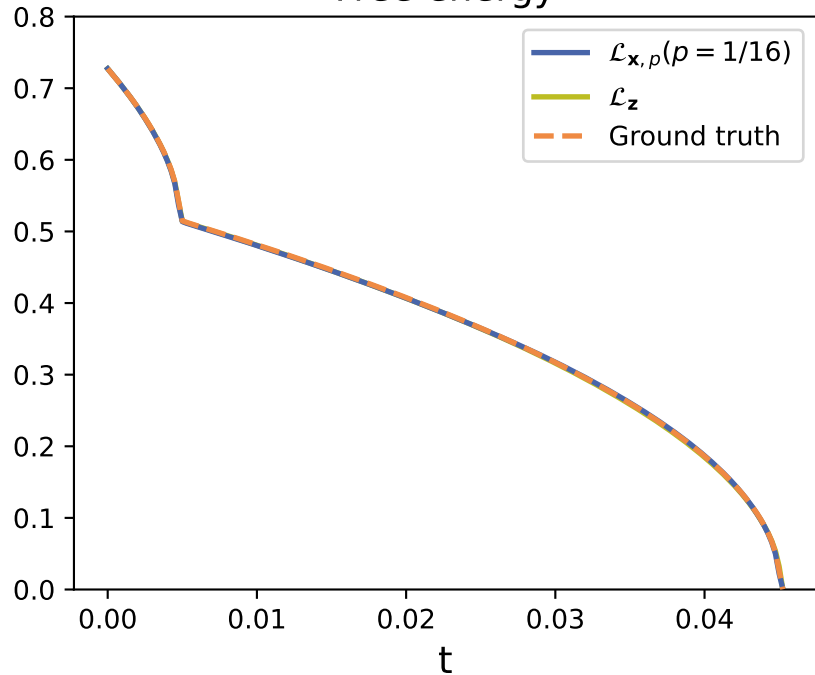

Error

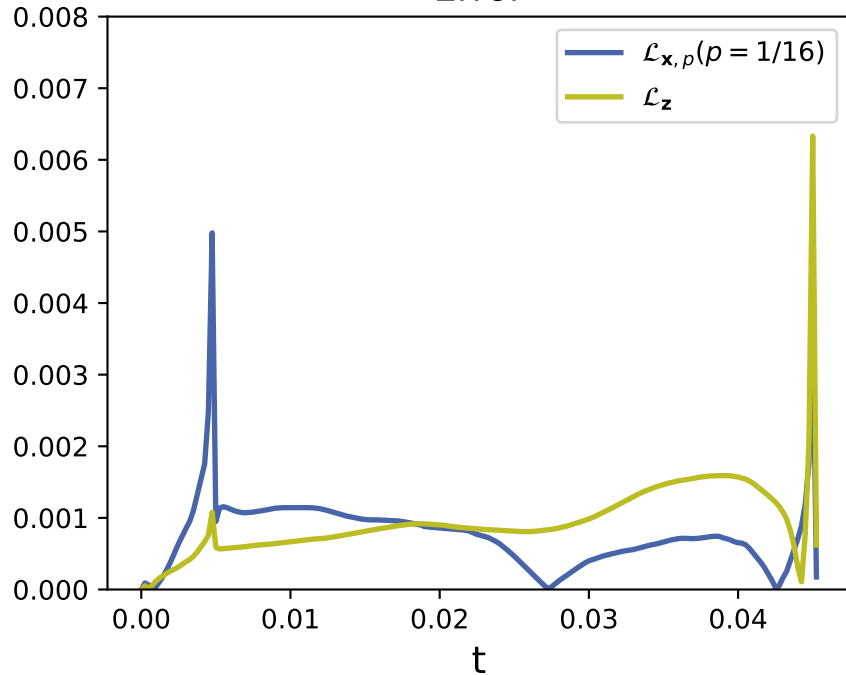

Supplement: supplementary_material [file attachment]

Predictions of  $\bar{u}$ 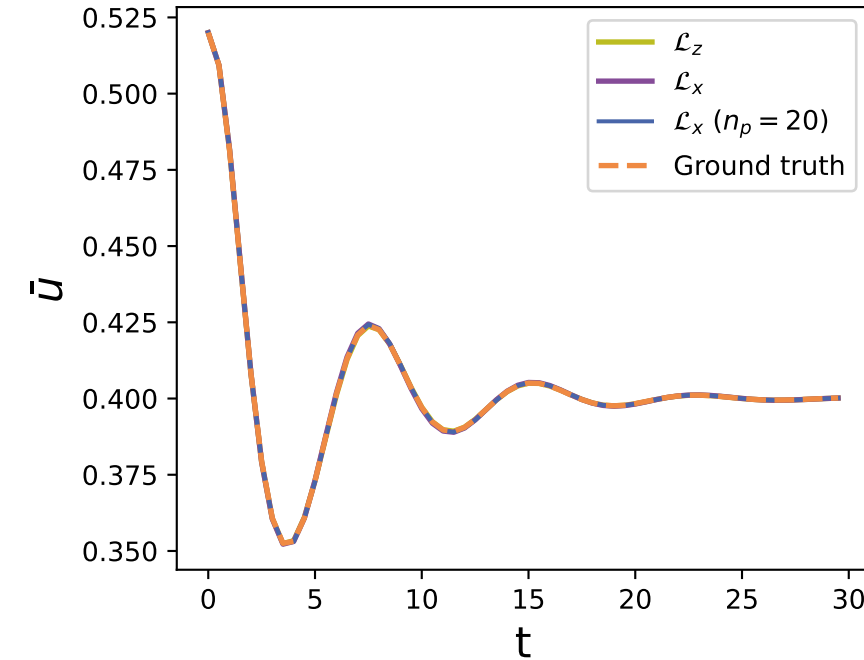Predictions of  $\bar{v}$ 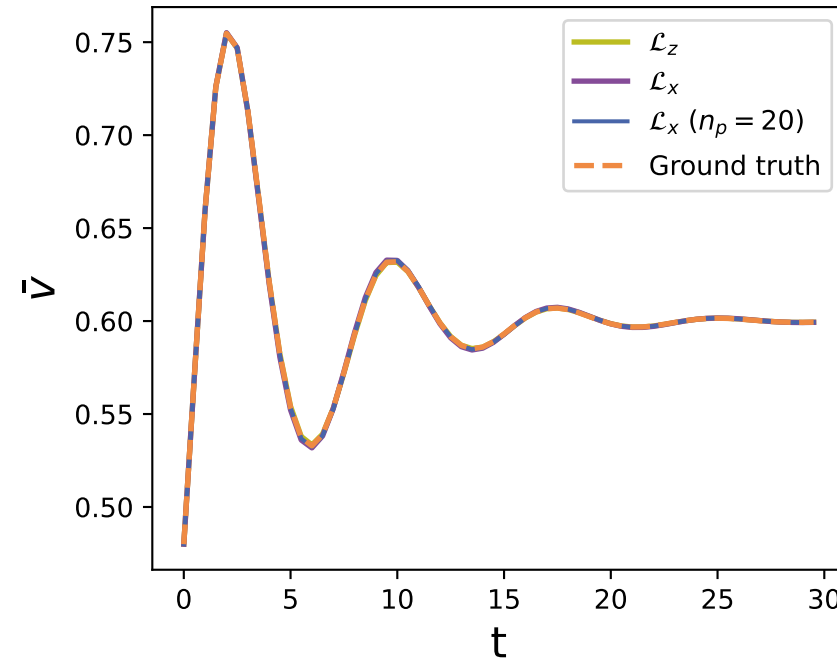

Predictions in the phase plane

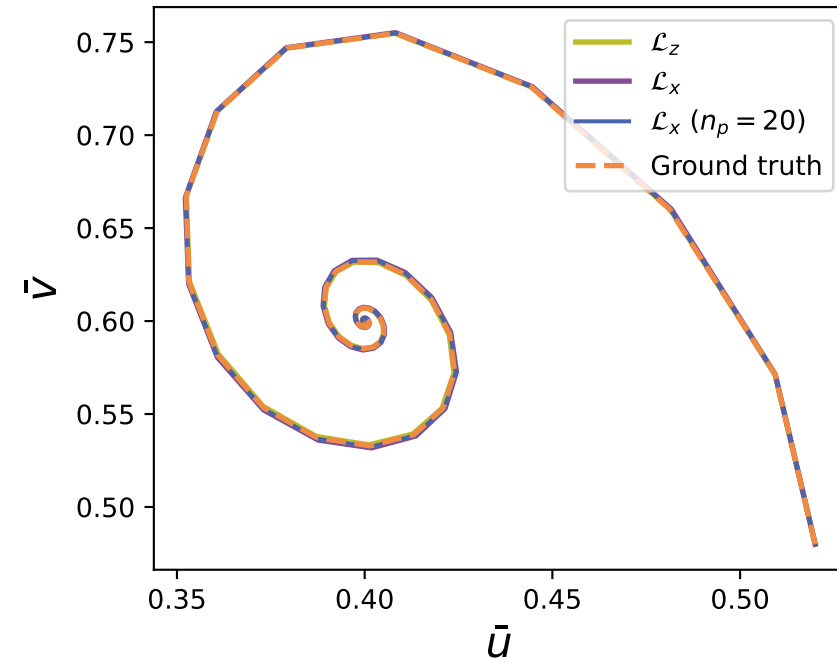

Error

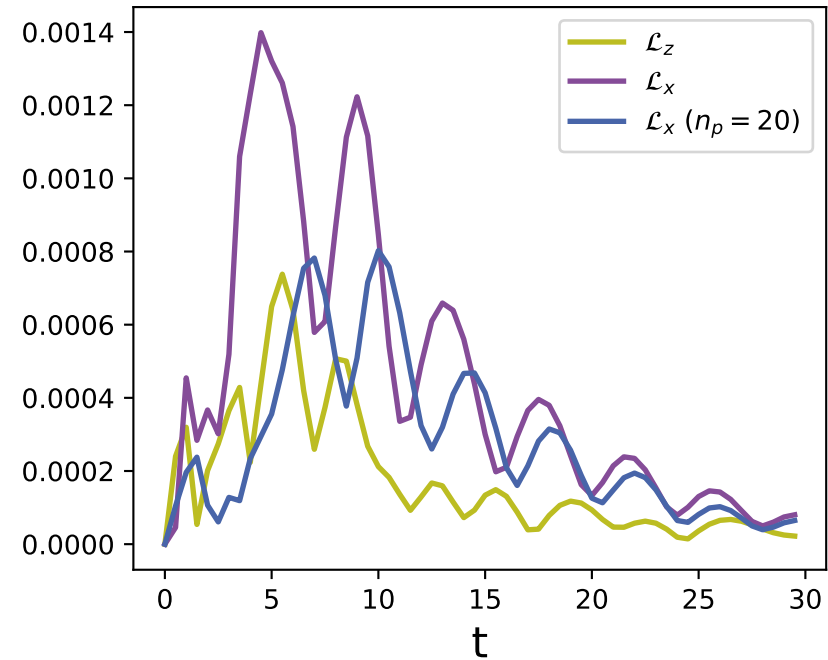

Supplement: supplementary_material [file attachment]

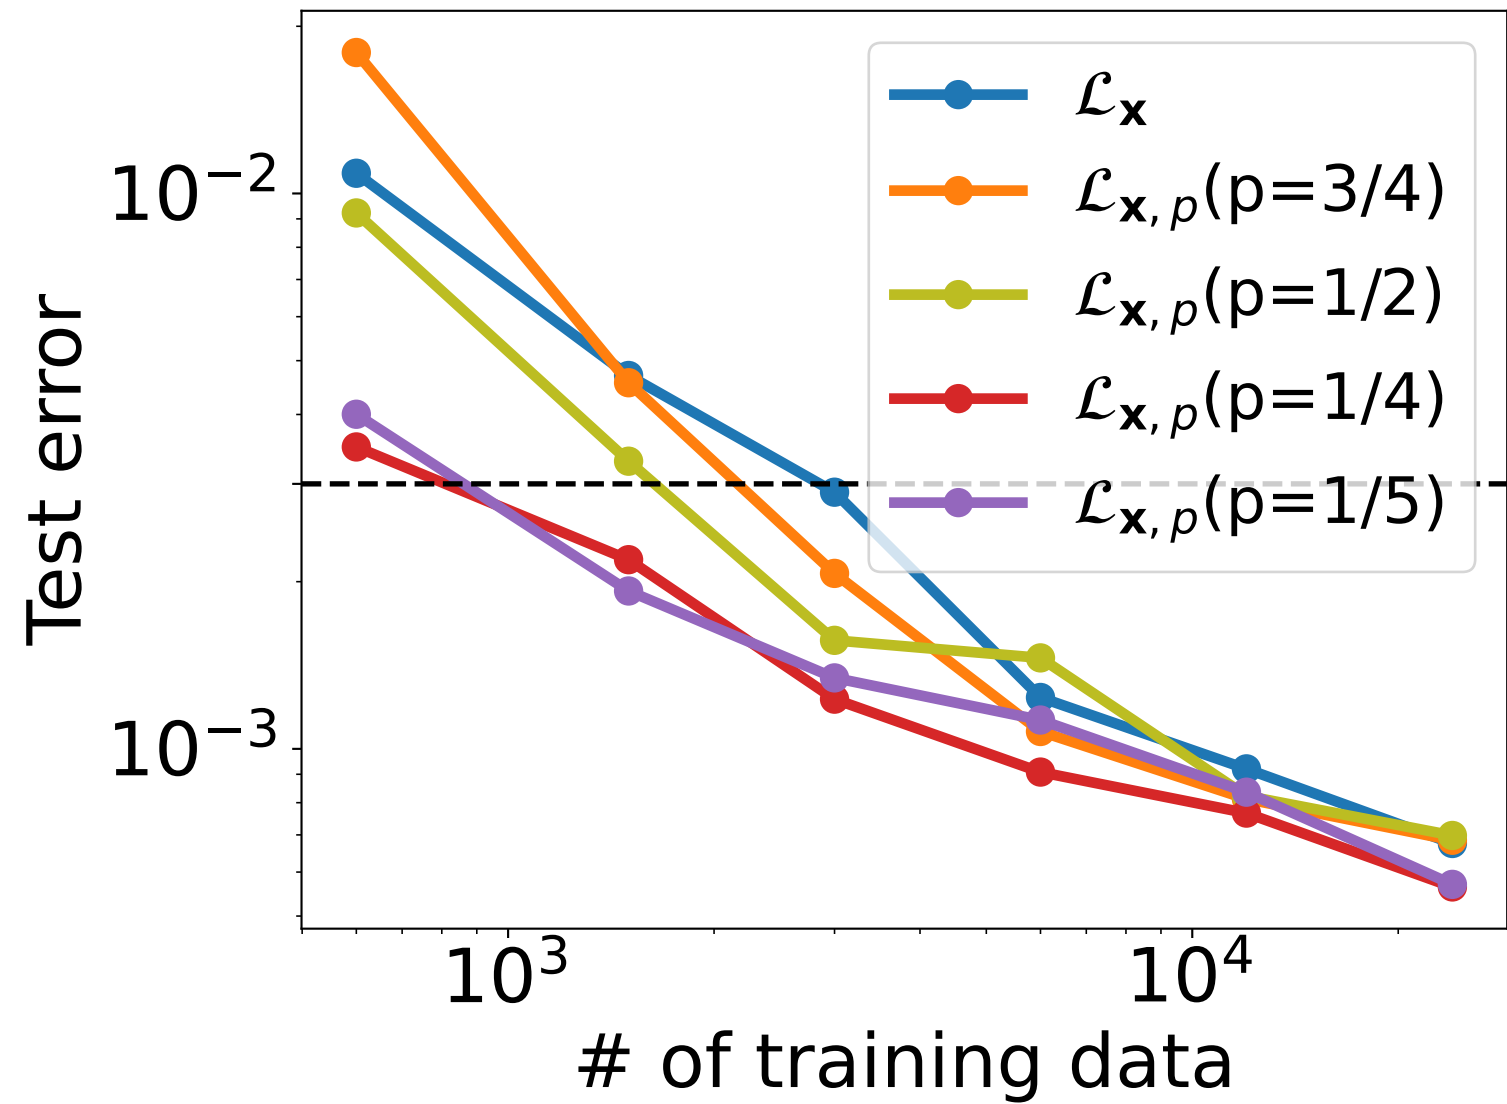

Supplement: supplementary_material [file attachment]

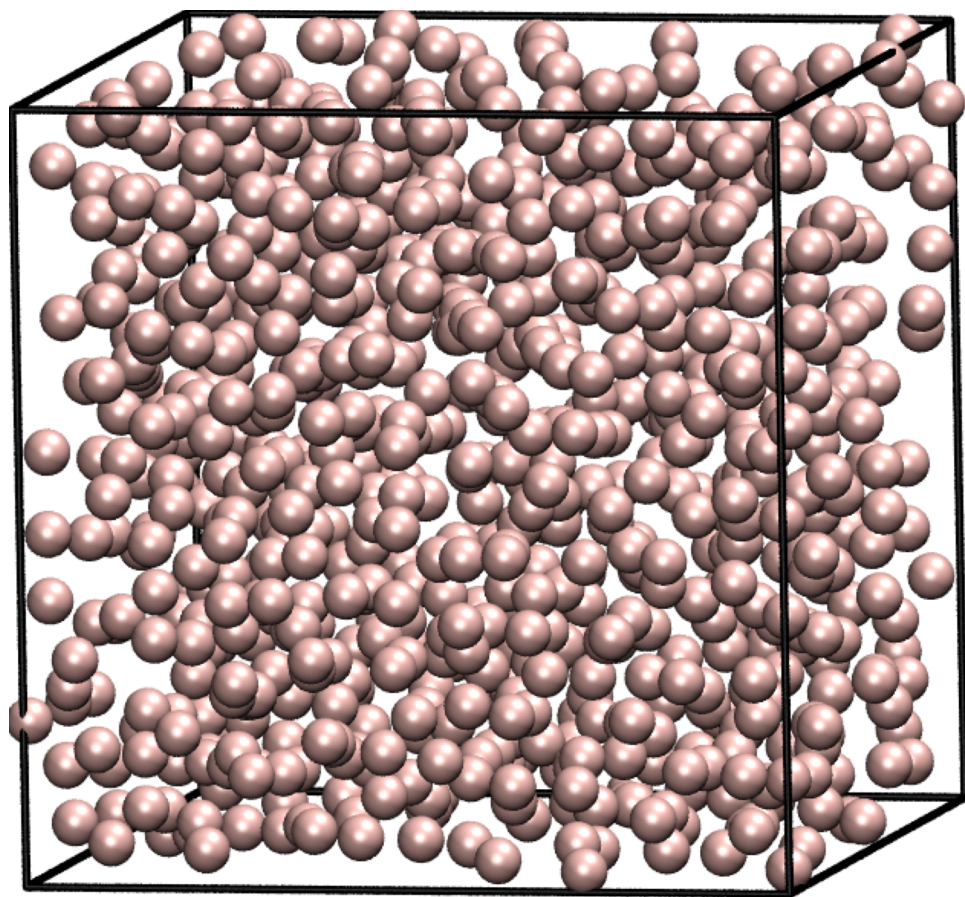

Supplement: supplementary_material [file attachment]

Free energy

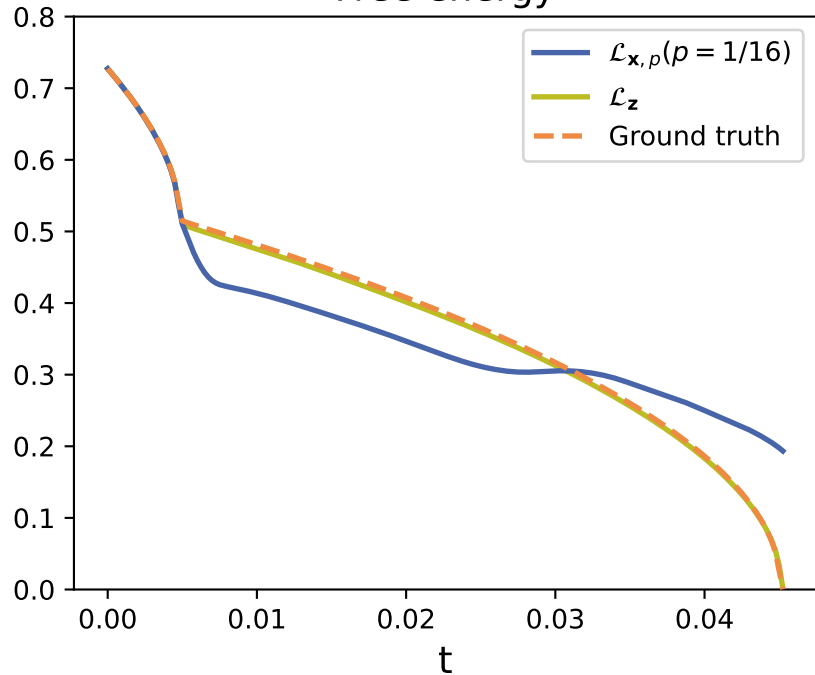

Error

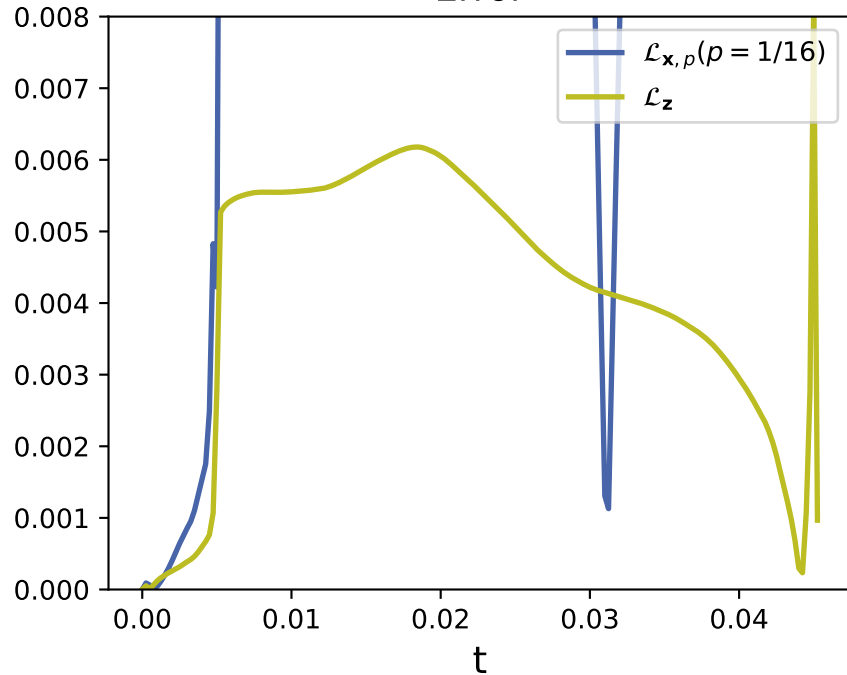

Supplement: supplementary_material [file attachment]

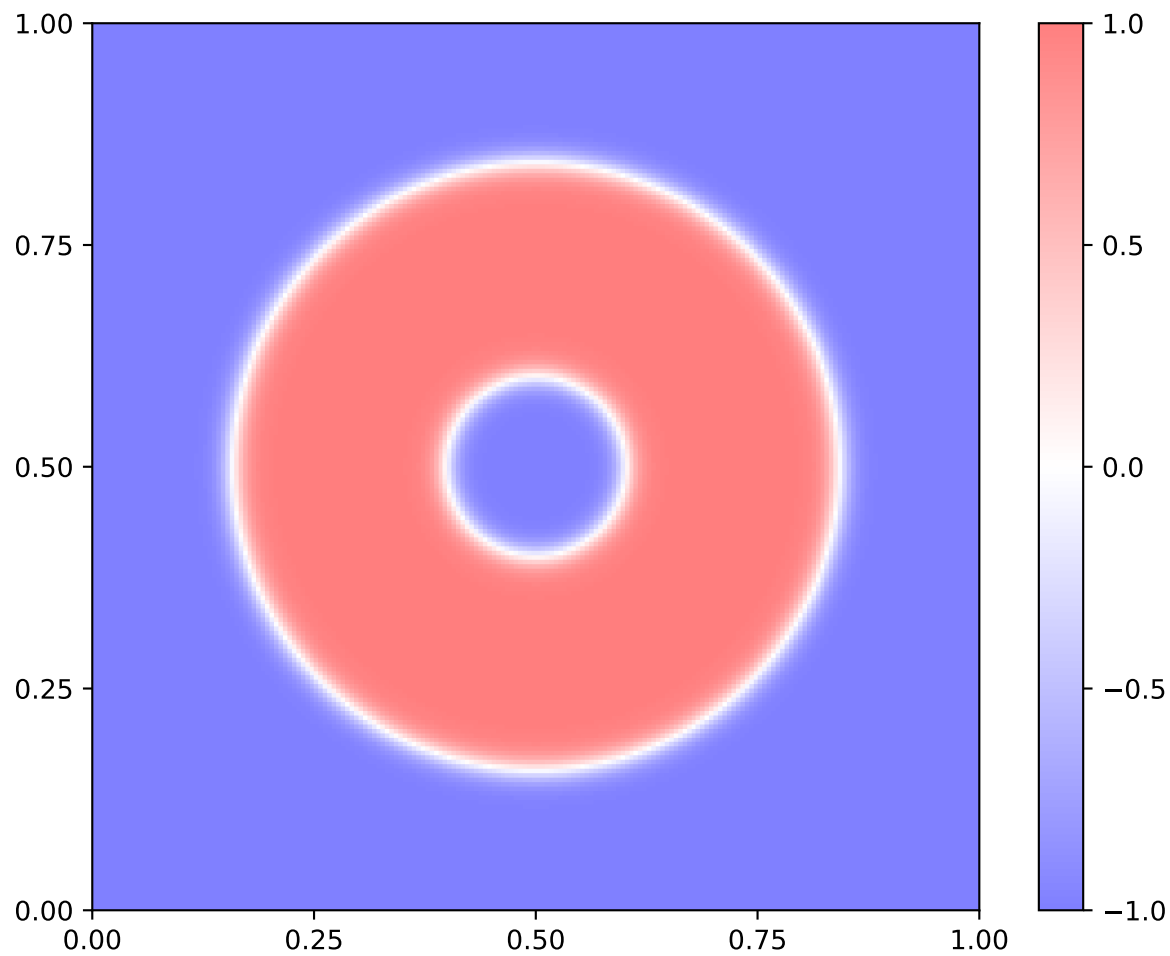

Supplement: supplementary_material [file attachment]

Predictions of  $\bar{u}$ 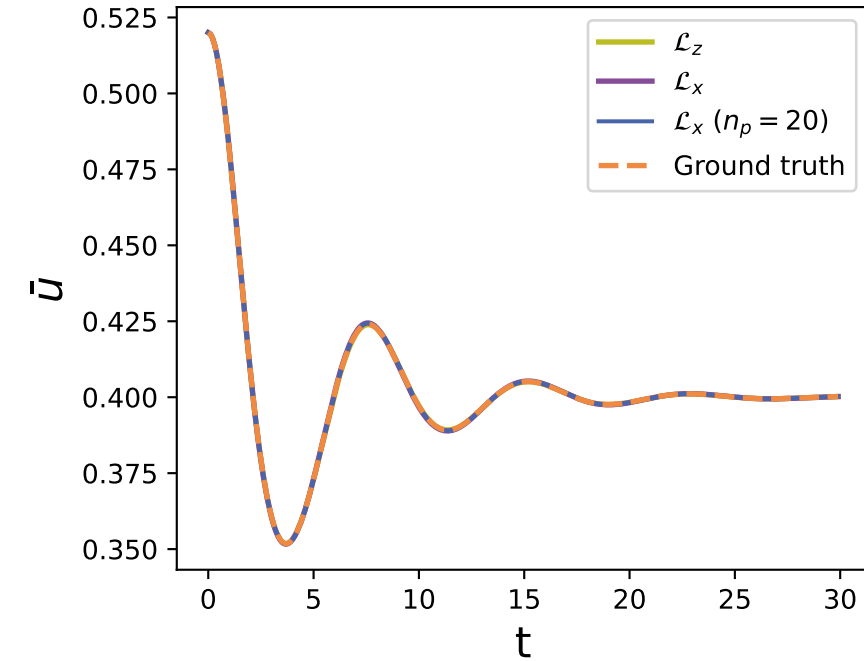Predictions of  $\bar{v}$ 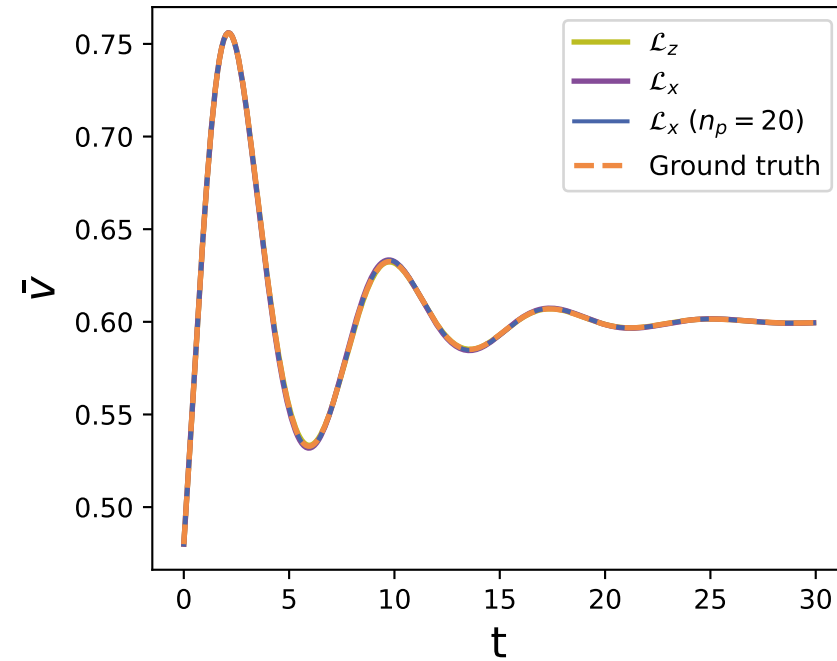

Predictions in the phase plane

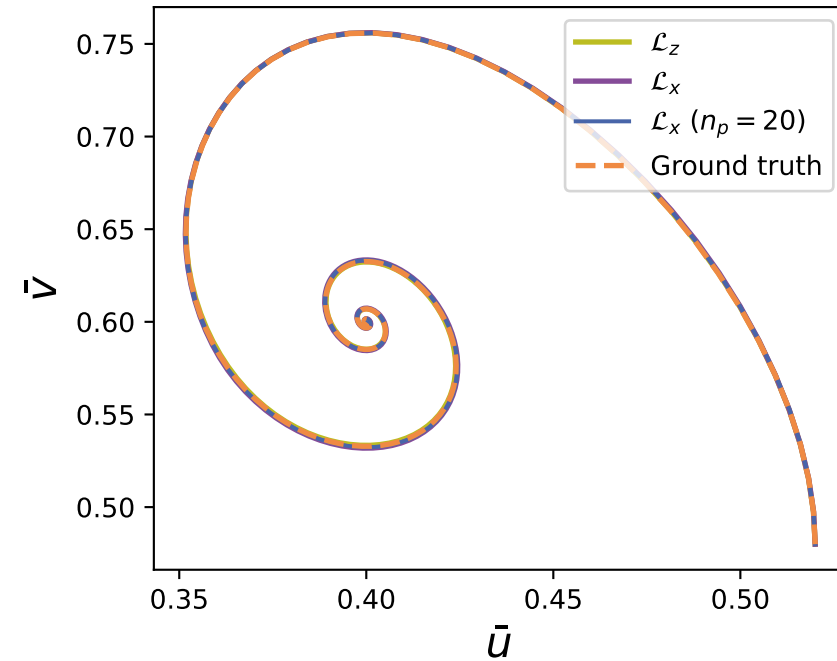

Error

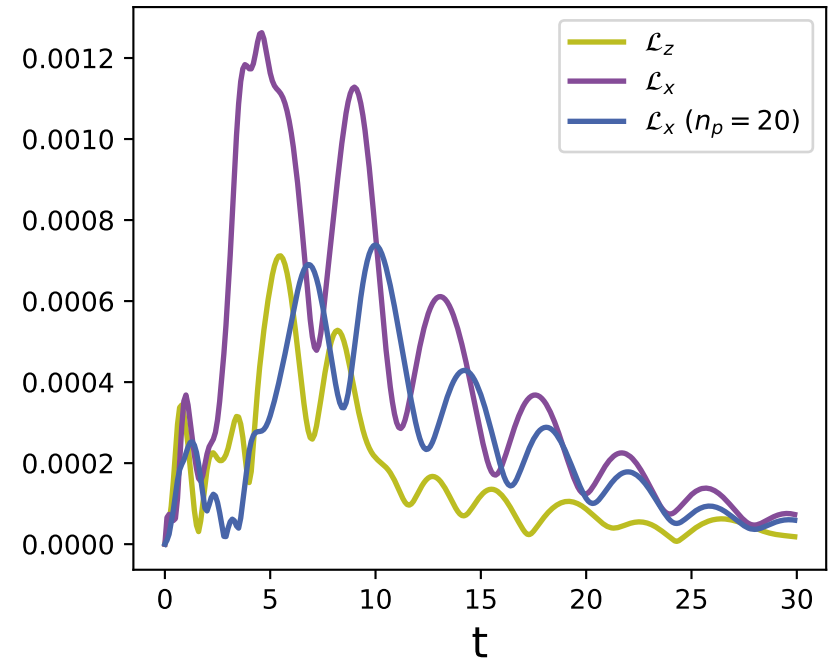

Supplement: supplementary_material [file attachment]

Initial condition

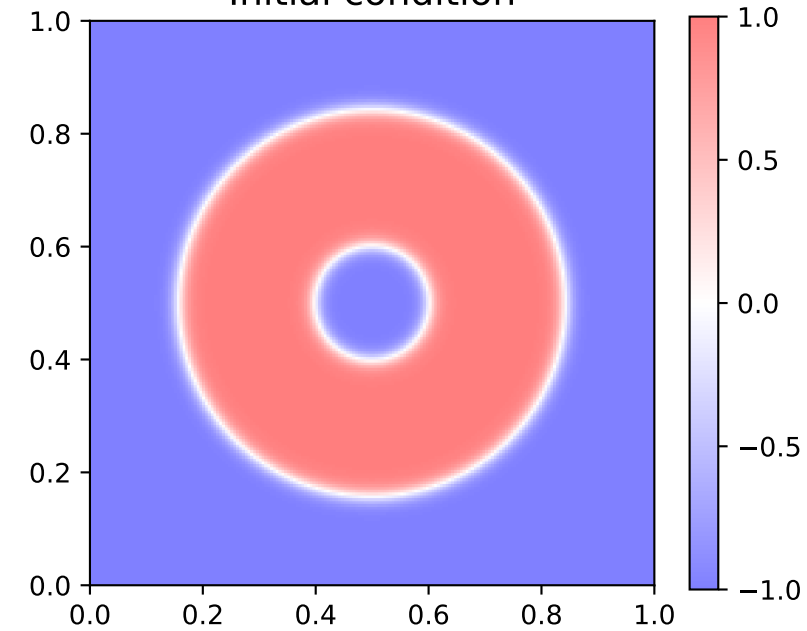

Free energy

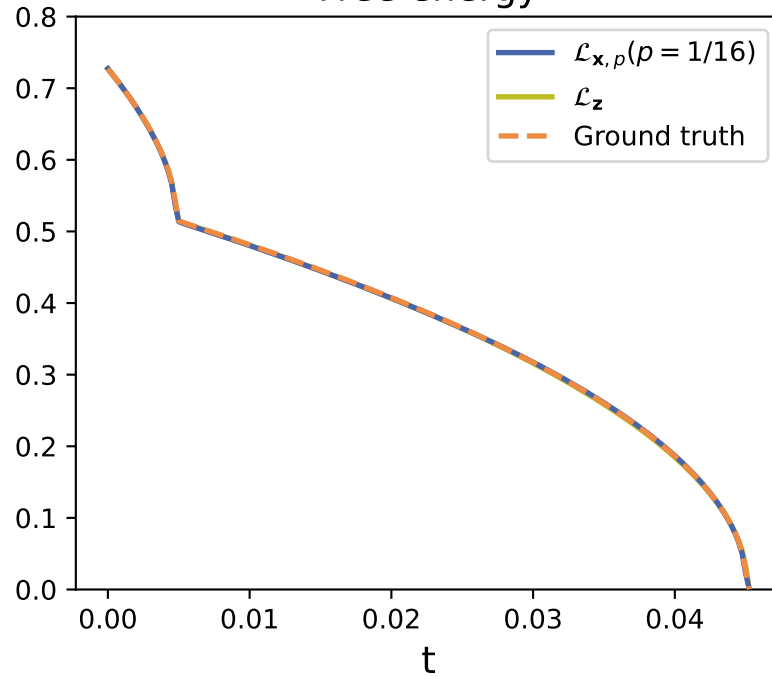

Error

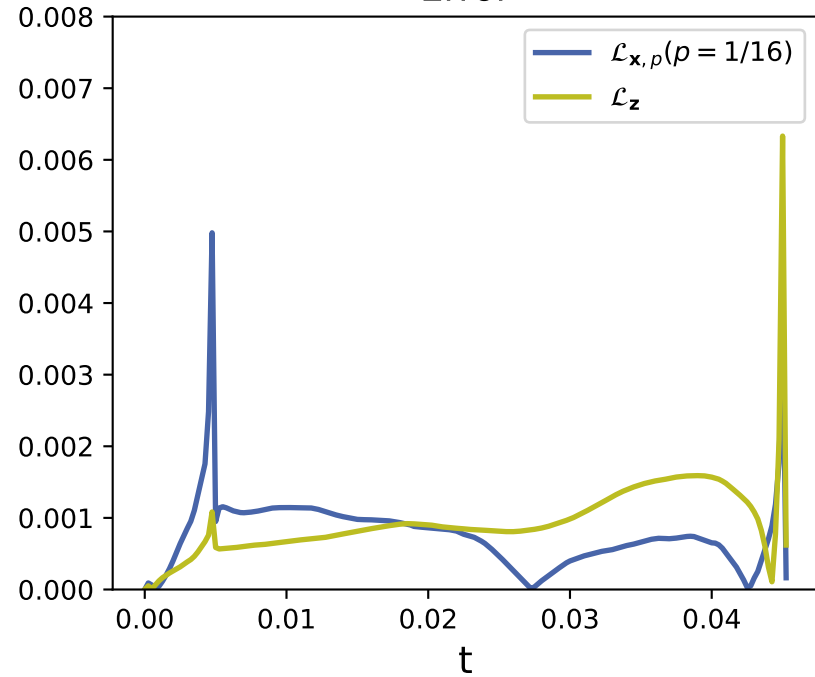

Supplement: supplementary_material [file attachment]

Predictions of  $\bar{u}$ Predictions of  $\bar{v}$ 

Predictions in the phase plane



Error



Supplement: supplementary_material [file attachment]

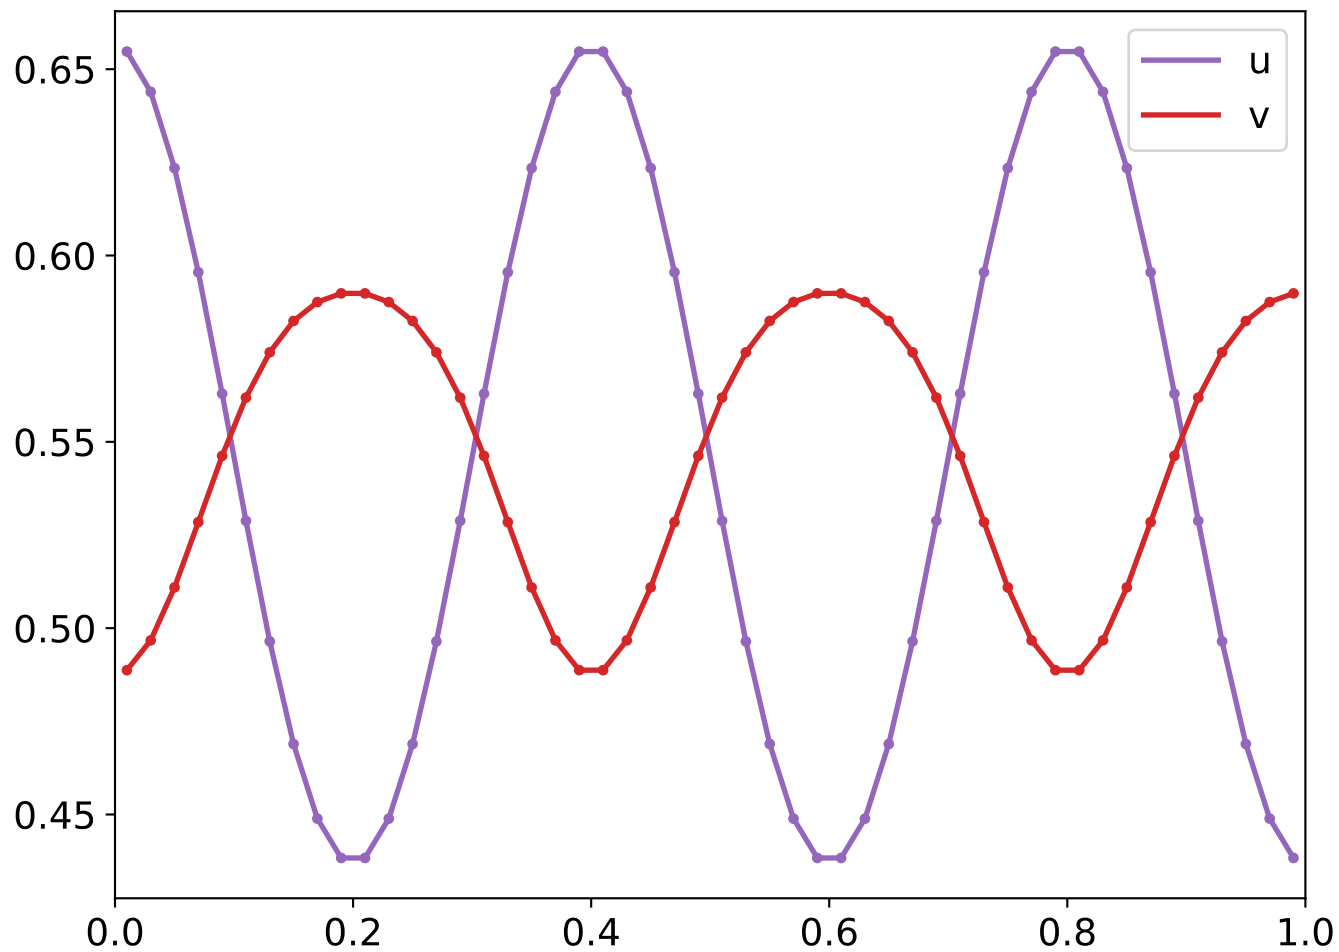

Supplement: supplementary_material [file attachment]
